# Supplementary material for: Tackling (Childhood) Obesity through a Voluntary Food Reformulation Policy: A Repeated Cross-Sectional Study Investigating Nutritional Changes in the Out-of-Home Sector
Source: MDPI journal article supplement (doi:10.3390/nu15143149), 2023-07-14
Supplement: s1 [file s1]

## Supplementary File S1

**Table S1. Product categorisation**

| Category      | Source | Products                                                                                                                                                                                                                                                                                                                                         |
|---------------|--------|--------------------------------------------------------------------------------------------------------------------------------------------------------------------------------------------------------------------------------------------------------------------------------------------------------------------------------------------------|
| Biscuits      | PHE    | All types of sweet biscuits, cereal bars and toaster pastries; breakfast biscuits; rice cakes; gluten free biscuits; in-store bakery products                                                                                                                                                                                                    |
|               | MCA    | Biscuit & cookie; cookie; gingerbread; shortbread; fruit bar cereal bar; cereal bar/flapjack; confectionery/biscuit; granola                                                                                                                                                                                                                     |
| Cakes         | PHE    | All types of cakes, ambient and chilled, including cake bars and slices                                                                                                                                                                                                                                                                          |
|               | MCA    | Brownie; Bakewell bar slice; almond bar slice; caramel millionaires billionaires bar slice; churros; rocky road bar slice; cake - total; tiffin; traybake cake/caramel bar/rocky road/flapjack/almond slice etc.; traybake/slice/bar/bite; energy slice bar bite; muffin sweet; muffin; flapjack; cake/muffin/tart                               |
| Ice cream     | PHE    | All types of ice cream, dairy and non-dairy, choc ices, ice cream desserts, milk ice lollies, ice lollies; low fat/low calorie ice cream; sorbet; frozen yogurt                                                                                                                                                                                  |
|               | MCA    | Frozen yogurt; ice cream - ice cream; sorbet; ice cream – sundae                                                                                                                                                                                                                                                                                 |
| Morning Goods | PHE    | Includes croissants, crumpets, English muffins, buns, teacakes, scones, waffles, Danish pastries, fruit loaves, bagels                                                                                                                                                                                                                           |
|               | MCA    | Bagel - sweet; Belgian bun; breakfast loaf; bun, bread, pancake, scone & waffle; cinnamon bun roll swirl; croissant; croissant sweet - total including pain au and twist; crepe; crumpet; Danish pastry; Danish pastry/doughnut; fruit bread fruit toast; iced bun; scone; teacake; teacake Welsh cake; waffle; toasted muffin                   |
| Puddings      | PHE    | All types of ambient, chilled and frozen large and individual pies, tarts and flans, cheesecake, gateaux, dairy desserts, sponge and rice puddings.<br>Also in data file: Pancakes, waffles, pastel de nata, fruit salad, custard, freakshake cake, warm brownie with ice cream, warm cookie dough sandwich with ice cream, chocolate fudge cake |
|               | MCA    | Cheesecake - total; crème brulee; crème caramel; crumble; eclair choux or profiterole; Eton mess; meringue-based dessert; mousse; panna cotta; pie sweet - total; posset; rice pudding; soufflé; sticky toffee pudding; tart sweet - total; tiramisu; trifle; cold dessert; hot dessert; other dessert; pie/tart; jelly; fondant                 |
