# Supplementary material for: Tackling (Childhood) Obesity through a Voluntary Food Reformulation Policy: A Repeated Cross-Sectional Study Investigating Nutritional Changes in the Out-of-Home Sector
Source: MDPI journal article supplement (doi:10.3390/nu15143149), 2023-07-14
Supplement: s1 [file s1]

**Supplementary File S4:****Table S3.** Descriptive statistics for subset with per 100g data

| Menu             |                         | Mean | Standard deviation | Median | Inter-quartile range |
|------------------|-------------------------|------|--------------------|--------|----------------------|
| Adult<br>(n=751) | Sugar g/100g            | 25.3 | 9.78               | 25.0   | 18.9 - 32.0          |
|                  | Fat g/100g              | 17.6 | 7.77               | 17.4   | 12.8 - 22.3          |
|                  | kcal/100g               | 3.6  | 1.00               | 3.7    | 3.0 - 4.3            |
|                  | Sugar g/portion         | 24.0 | 13.50              | 22.4   | 15.0 - 31.2          |
|                  | Fat g/portion           | 16.0 | 8.79               | 15.4   | 10.0 - 21.0          |
|                  | Saturated fat g/portion | 7.5  | 5.20               | 6.9    | 3.6-10.2             |
|                  | Portion weight g        | 98   | 50.2               | 90     | 67 - 120             |
|                  | kcal/portion            | 331  | 141.2              | 325    | 237 - 398            |
| Child<br>(n=50)  | Sugar g/100g            | 22.3 | 8.81               | 23.4   | 17.0 - 35.4          |
|                  | Fat g/100g              | 6.4  | 5.7                | 6.5    | 0.2 - 13.3           |
|                  | kcal/100g               | 1.8  | 1.14               | 2      | 0.9 - 3.9            |
|                  | Sugar g/portion         | 16.5 | 8.11               | 16.3   | 10.8 - 25.3          |
|                  | Fat g/portion           | 4.5  | 4.18               | 4.6    | 0.1 - 9.6            |
|                  | Saturated fat g/portion | 2.7  | 2.54               | 2.95   | 0.1-3.7              |
|                  | Portion weight g        | 78   | 38.0               | 72     | 51 - 129             |
|                  | kcal/portion            | 130  | 83.5               | 122.5  | 70 - 239             |
