# Supplementary material for: Tackling (Childhood) Obesity through a Voluntary Food Reformulation Policy: A Repeated Cross-Sectional Study Investigating Nutritional Changes in the Out-of-Home Sector
Source: MDPI journal article supplement (doi:10.3390/nu15143149), 2023-07-14

Supplementary File S3.

**Figure S1.** Boxplots showing distributions of (a) sugar, (b) energy, (c) fat and (d) saturated fat per portion of dessert by category and year

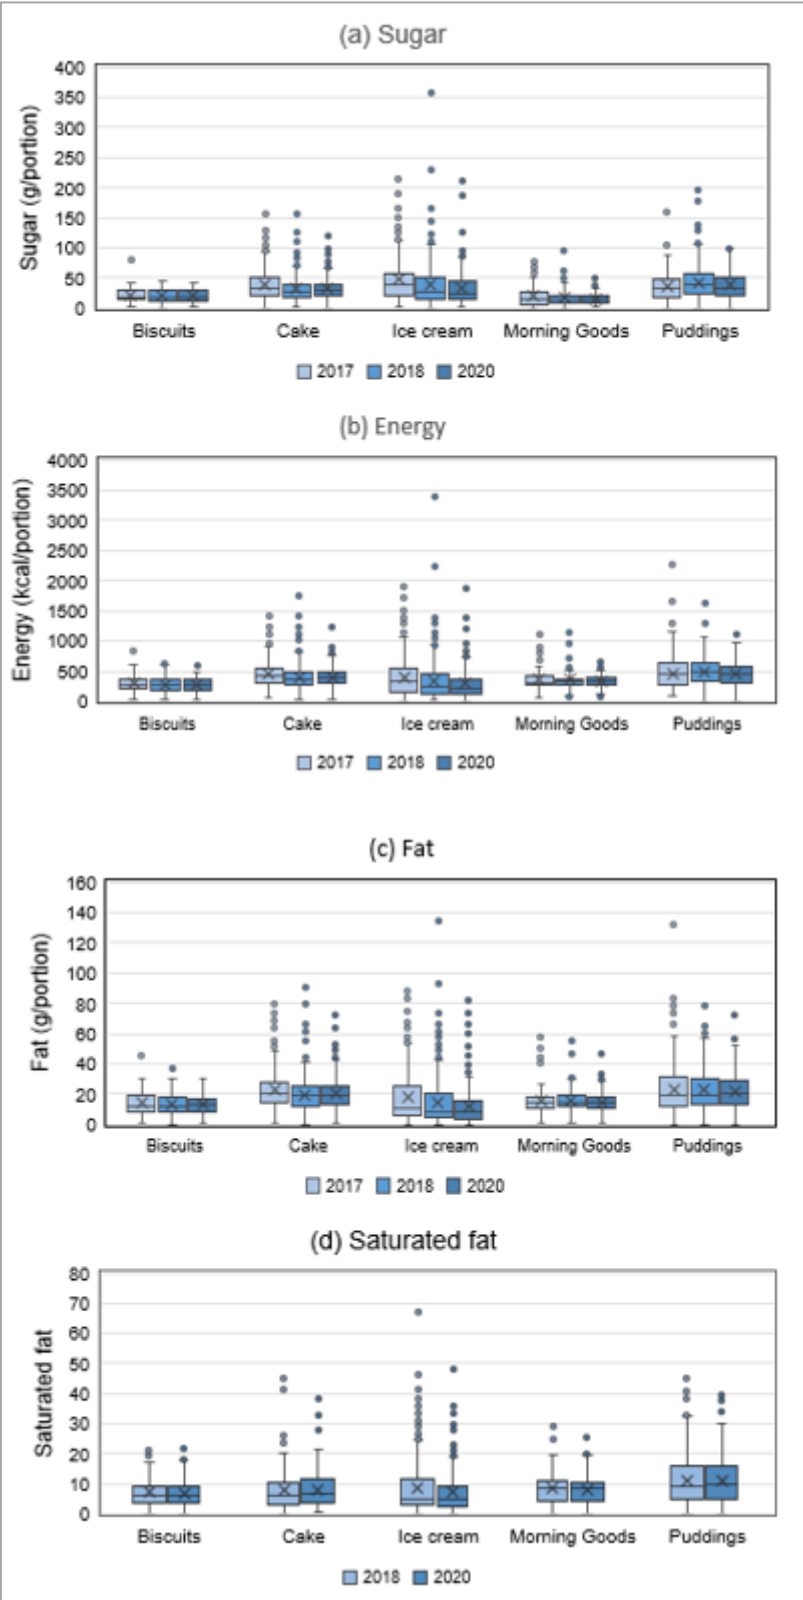

Supplement: s1 [file s1]
