# Supplementary material for: Tackling (Childhood) Obesity through a Voluntary Food Reformulation Policy: A Repeated Cross-Sectional Study Investigating Nutritional Changes in the Out-of-Home Sector
Source: MDPI journal article supplement (doi:10.3390/nu15143149), 2023-07-14
Supplement: s1 [file s1]

## Supplementary File S2

**Table S2.** Restaurants included in the study

| Brand                  | Channel | Outlets<br>2020 | Year<br>2018 or 2020 | Reason for exclusion<br>in 2020 |
|------------------------|---------|-----------------|----------------------|---------------------------------|
| All Bar One            | FSR     | 56              | Both                 |                                 |
| Ask Italian            | FSR     | 66              | Both                 |                                 |
| Beefeater              | FSR     | 165             | Both                 |                                 |
| Bella Italia           | FSR     | 78              | 2020                 |                                 |
| Bill's                 | FSR     | 80              | Both                 |                                 |
| Birds Bakery           | CCB     | 62              | 2020                 |                                 |
| Brewers Fayre          | FSR     | 160             | Both                 |                                 |
| Burger King            | FF      | 530             | Both                 |                                 |
| Café Rouge             | FSR     | 30              | 2020                 |                                 |
| Caffe Nero             | CCB     | 672             | Both                 |                                 |
| Chef & Brewer          | FSR     | 140             | Both                 |                                 |
| Chicken Cottage        | FF      | 47              | Both                 |                                 |
| Chipotle               | QSR     | 8               | 2018                 | < 20 outlets                    |
| Chop'd                 | QSR     | 13              | 2018                 | < 20 outlets                    |
| Coco di Mama           | FF      | 35              | Both                 |                                 |
| Coffee Republic        | CCB     | 30              | 2020                 |                                 |
| Coffee#1               | CCB     | 100             | 2020                 |                                 |
| Coopland & Son         | CCB     | 171             | 2020                 |                                 |
| Costa                  | CCB     | 2400            | Both                 |                                 |
| Crepe Affaire          | CCB     | 17              | 2018                 | < 20 outlets                    |
| Crown Carveries        | FSR     | 90              | 2018                 | No nutrition                    |
| Crussh                 | FC      | 35              | Both                 |                                 |
| Dominos                | FF      | 1126            | Both                 |                                 |
| EAT                    | QSR     | 0               | 2018                 | Ceased trading                  |
| Eating Inn             | FSR     | 0               | 2018                 | Ceased trading                  |
| Ember Inns             | FSR     | 138             | Both                 |                                 |
| Farmhouse Inns         | FSR     | 72              | 2018                 | No nutrition                    |
| Fayre & Square         | FSR     | 0               | 2018                 | Ceased trading                  |
| Flaming Grill          | FSR     | >20             | Both                 |                                 |
| Generous George        | FSR     | 20              | Both                 |                                 |
| Gourmet Burger Kitchen | FSR     | 60              | Both                 |                                 |
| Greggs                 | CCB     | 1953            | Both                 |                                 |
| Gusto                  | FSR     | 13              | 2018                 | < 20 outlets                    |
| Harvester              | FSR     | 230             | Both                 |                                 |
| Hungry Horse           | FSR     | 270             | Both                 |                                 |
| Itsu                   | FC      | 74              | Both                 |                                 |
| Jamie's Italian        | FSR     | 0               | 2018                 | Ceased trading                  |
| John Barras            | FSR     | 0               | 2018                 | Ceased trading                  |
| Kentucky Fried Chicken | FF      | 900             | Both                 |                                 |

|                  |     |      |        |                              |
|------------------|-----|------|--------|------------------------------|
| Krispy Kreme     | CCB | 130  | Both   |                              |
| Leon             | FC  | 65   | Both   |                              |
| Lloyds No. 1     | FSR | 1    | 2018   | < 20 outlets                 |
| Loch Fyne        | FSR | 10   | 2018   | < 20 outlets                 |
| McDonalds        | FF  | 1300 | Both   |                              |
| Nando's          | FSR | 340  | Both   |                              |
| Old English Inns | FSR | 100  | 2018   | No nutrition                 |
| O'Neill's        | FSR | 49   | 2018   | No nutrition                 |
| Papa John's      | FF  | 450  | Both   |                              |
| Paul             | CCB | 37   | Both   |                              |
| Pizza Express    | FSR | 470  | Both   |                              |
| Pizza Hut        | FF  | 215  | Both   |                              |
| Pod              | QSR | 6    | 2018   | < 20 outlets                 |
| Pret             | CCB | 367  | Both   |                              |
| Prezzo           | FSR | 180  | 2020   |                              |
| Pure             | FC  | 22   | Both   |                              |
| Shake Shack      | QSR | 17   | 2018   | < 20 outlets                 |
| Sizzling Pubs    | FSR | >20  | Both   |                              |
| Slug & Lettuce   | FSR | 83   | 2018   | No nutrition                 |
| Soho Coffee Co   | CCB | 35   | Both   |                              |
| Starbucks        | CCB | 995  | Both   |                              |
| Stonehouse Pizza | FSR | 90   | Both   |                              |
| Suburban         | FSR | 0    | 2018   | No UK website                |
| Subway           | FF  | 2229 | Both   |                              |
| Table Table      | FSR | 80   | Both   |                              |
| Taco Bell        | FF  | 50   | Both   |                              |
| Taylor Walker    | FSR | 0    | 2018   | Ceased trading               |
| Tim Hortons      | CCB | 27   | Both   |                              |
| Toby Carvery     | FSR | 151  | Both   |                              |
| Two for One      | FSR | 90   | Both   |                              |
| Vintage Inns     | FSR | 186  | Both   |                              |
| Wagamama         | FSR | 149  | Both   |                              |
| Walkabout        | FSR | 21   | 2018   | No nutrition                 |
| Wasabi           | QSR | 39   | 2018   | No nutrition for desserts    |
| Wetherspoons     | FSR | 861  | Both   |                              |
| Wild Bean Café   | CCB | 350  | Both   |                              |
| Wimpy            | FF  | 71   | Both   |                              |
| Yates's          | FSR | 29   | 2018   | No nutrition for desserts    |
| Yo! Sushi        | FSR | 80   | Both   |                              |
| Zizzi            | FSR | 130  | (2020) | Excluded after data cleaning |
