# Supplementary material for: Tackling (Childhood) Obesity through a Voluntary Food Reformulation Policy: A Repeated Cross-Sectional Study Investigating Nutritional Changes in the Out-of-Home Sector
Source: Nutrients. 2023 Jul 14;15(14):3149. doi: 10.3390/nu15143149 (PMC10384819; doi:10.3390/nu15143149)
Supplement: Supplementary file 1 [file nutrients-15-03149-s001.zip]

Archive with 4 entries (4 files):
- Supplementary File S1. Product categorisation.pdf
- Supplementary File S2. Restaurants included in the study.pdf
- Supplementary File S3. Distributions of sugar, energy, fat and saturated fat by category and year.pdf
- Supplementary File S4. Descriptive statistics for subset with per 100g data.pdf
